# Supplementary material
Source: PubMed Central journal article supplement (PMC7577828)
Supplement: NIHMS1636136-supplement-Material_list.pdf [file NIHMS1636136-supplement-Material_list.pdf]

Materials List for:

# Analysis of Congenital Heart Defects in Mouse Embryos Using Qualitative and Quantitative Histological Methods

Kristen Ball<sup>1,2</sup>, Renee Kinne<sup>2</sup>, Aitor Aguirre<sup>1,2</sup>

<sup>1</sup>Department of Biomedical Engineering, Michigan State University

<sup>2</sup>Institute for Quantitative Health Sciences and Engineering, Michigan State University

Correspondence to: Aitor Aguirre at [aaguirre@msu.edu](mailto:aaguirre@msu.edu)

URL: <https://www.jove.com/video/60926>

DOI: [doi:10.3791/60926](https://doi.org/10.3791/60926)

## Materials

| Name                                        | Company                 | Catalog Number          | Comments                                 |
|---------------------------------------------|-------------------------|-------------------------|------------------------------------------|
| 15 mL Conical Tube(s)                       | Fisher Scientific       | # 1495970C              |                                          |
| C57BL/6J Mice                               | Jackson Labs            | C57BL/6J - stock 000664 |                                          |
| Coplin Staining Jars (x6)                   | VWR Scientific          | # 25457-006             |                                          |
| Coverslips 24X50MM #1.5                     | VWR Scientific          | # 48393-241             |                                          |
| Cryostat - Leica CM3050S                    | Leica                   | N/A                     |                                          |
| Dissecting Dish(s)                          | Fisher Scientific       | # 50930381              |                                          |
| Dumont #5 - Fine Forceps (x2)               | Fine Science Tools      | # 11254-20              |                                          |
| Eosin Y Solution                            | Millipore Sigma         | # HT110116-500ML        |                                          |
| Ethyl Alcohol (Pure, 200 proof)             | Fisher Scientific       | # BP2818-500            |                                          |
| Ethylenediaminetetraacetic acid (EDTA)      | Millipore Sigma         | # E9884-100G            |                                          |
| Eukitt                                      | Millipore Sigma         | # 03989-100ML           |                                          |
| Fine Scissors                               | Fine Science Tools      | # 14060-10              |                                          |
| Fluorescent Stereo Microscope Leica M165 FC | Leica                   | N/A                     |                                          |
| Glycine                                     | Millipore Sigma         | # 410225-250G           |                                          |
| Graefe Forceps                              | Fine Science Tools      | # 11052-10              |                                          |
| Graphpad Prism 8 Software                   | Graphpad                |                         |                                          |
| ImageJ Software                             | ImageJ                  |                         |                                          |
| Kimwipes                                    | Fisher Scientific       | # 06666A                |                                          |
| Mayer's hematoxylin solution                | Millipore Sigma         | # MHS16-500ML           |                                          |
| Micropipette tip(s) - p200                  | Fisher Scientific       | # 02707448              |                                          |
| Microsoft Excel Software                    | Microsoft               |                         |                                          |
| OCT Compound                                | VWR Scientific          | # 102094-106            |                                          |
| Olympus CkX53 Microscope                    | Olympus                 |                         |                                          |
| Paint Brushes (at least 2)                  |                         |                         |                                          |
| Paraformaldehyde                            | VWR Scientific          | # 0215014601            | Make into 4% solution (dissolved in PBS) |
| Pasteur pipette(s)                          | Fisher Scientific       | # 13-711-7M             |                                          |
| Penicillin-Streptomycin                     | ThermoFisher Scientific | # 15140122              |                                          |
| Phosphate Buffered Saline (PBS)             | ThermoFisher Scientific | # 70011044              | Dilute from 10x to 1x before using       |
| Scale                                       | Mettler Toledo          | # MS1602TS              |                                          |
| Scale                                       | Mettler Toledo          | # MS105                 |                                          |
| Scalpel Handle #3                           | VWR Scientific          | # 10161-918             |                                          |

|                                                  |                    |              |               |
|--------------------------------------------------|--------------------|--------------|---------------|
| Scalpel Blades                                   | VWR Scientific     | # 21909-612  |               |
| Square Mold                                      | VWR Scientific     | # 100500-224 | For OCT molds |
| Sucrose                                          | Millipore Sigma    | # S9378-500G |               |
| Superfrost Plus Slides                           | Fisher Scientific  | # 1255015    |               |
| Surgical Scissors                                | Fine Science Tools | # 14002-14   |               |
| Tissue-Tek Accu-Edge Disposable Microtome Blades | VWR Scientific     | # 25608-964  |               |
| Travel Scale                                     | Acculab            | VIC 5101     |               |
| Xylene                                           | Millipore Sigma    | 214736-1L    |               |
